# Supplementary material for: Mediterranean Diet-Based Interventions to Improve Anthropometric and Obesity Indicators in Children and Adolescents: A Systematic Review with Meta-Analysis of Randomized Controlled Trials
Source: PubMed Central journal article supplement (PMC10334150; doi:10.1016/j.advnut.2023.04.011), 2023-04-29

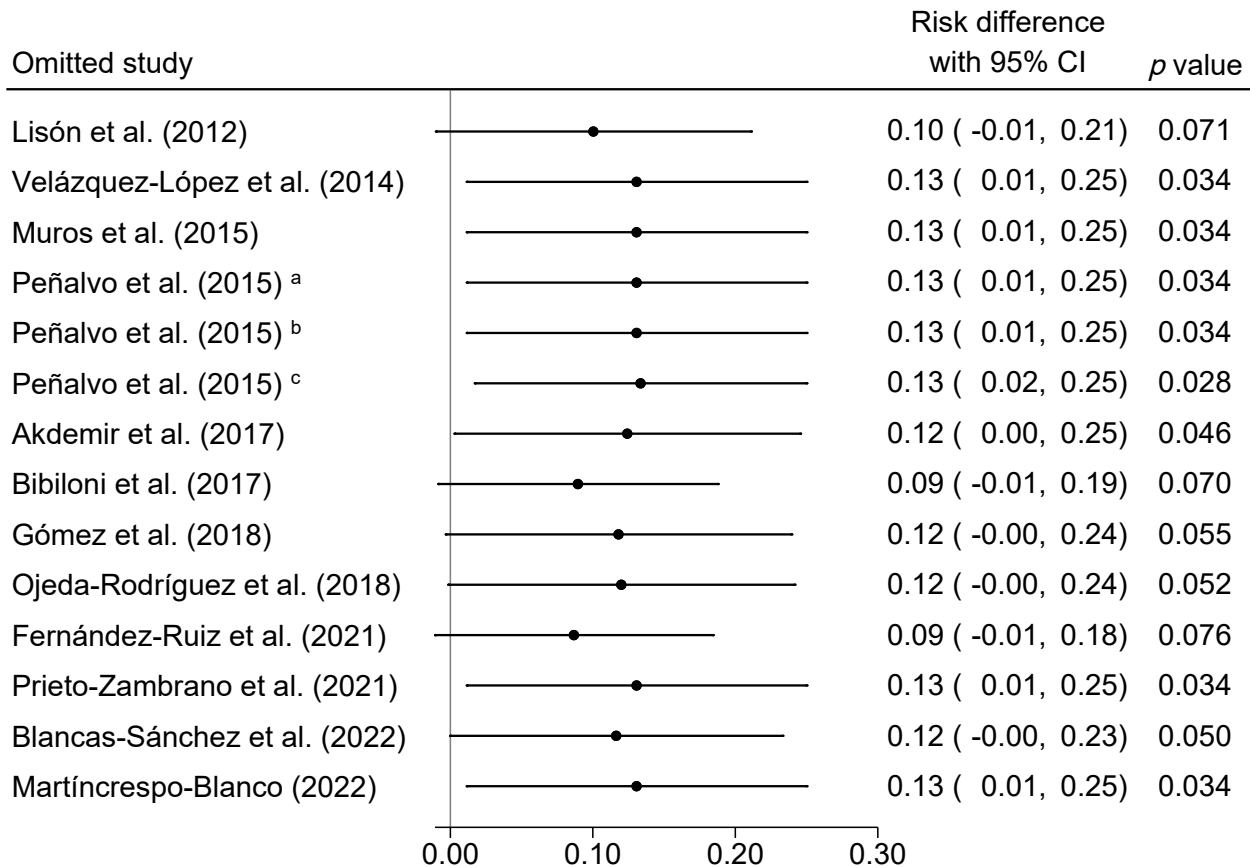

Supplement: mmc4.pdf [file mmc4.pdf]
