# Supplementary material for: Mediterranean Diet-Based Interventions to Improve Anthropometric and Obesity Indicators in Children and Adolescents: A Systematic Review with Meta-Analysis of Randomized Controlled Trials
Source: PubMed Central journal article supplement (PMC10334150; doi:10.1016/j.advnut.2023.04.011), 2023-04-29

LFK index = -2.13 (major asymmetry)

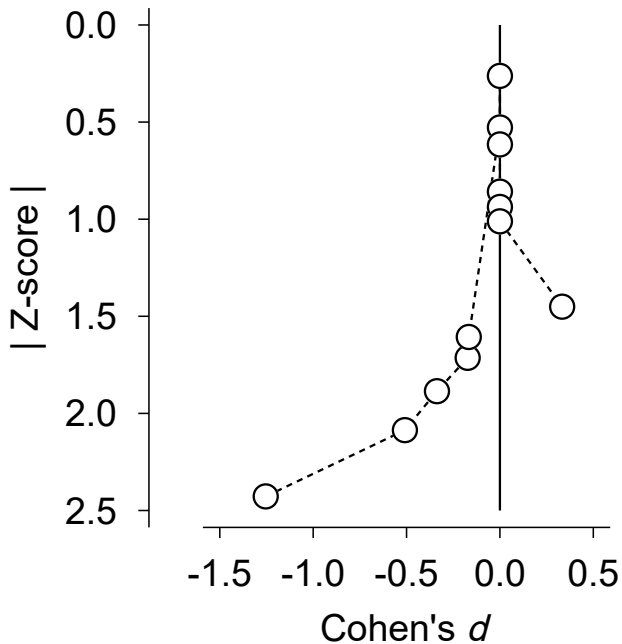

Supplement: mmc8.pdf [file mmc8.pdf]
